# Supplementary material for: Methodological limitations in experimental studies on symptom development in individuals with idiopathic environmental intolerance attributed to electromagnetic fields (IEI-EMF) – a systematic review
Source: PubMed Central journal article supplement (PMC6805477; doi:10.1186/s12940-019-0519-x), 2019-10-22

■ method appropriate to reduce the likelihood for false positive or false negative results 
 ■ studies completely fulfilling the requirements 
 ■ studies partly fulfilling the requirements  
■ method considered a source of high risk of bias 
 ■ method considered a source of imprecision 
 ■ key question not applicable  
+ high risk of bias in favour of an effect of exposure 
 - high risk of bias in favour of a null result 
 ± high risk of bias with uncertain direction on study outcome

## SELECTION BIAS

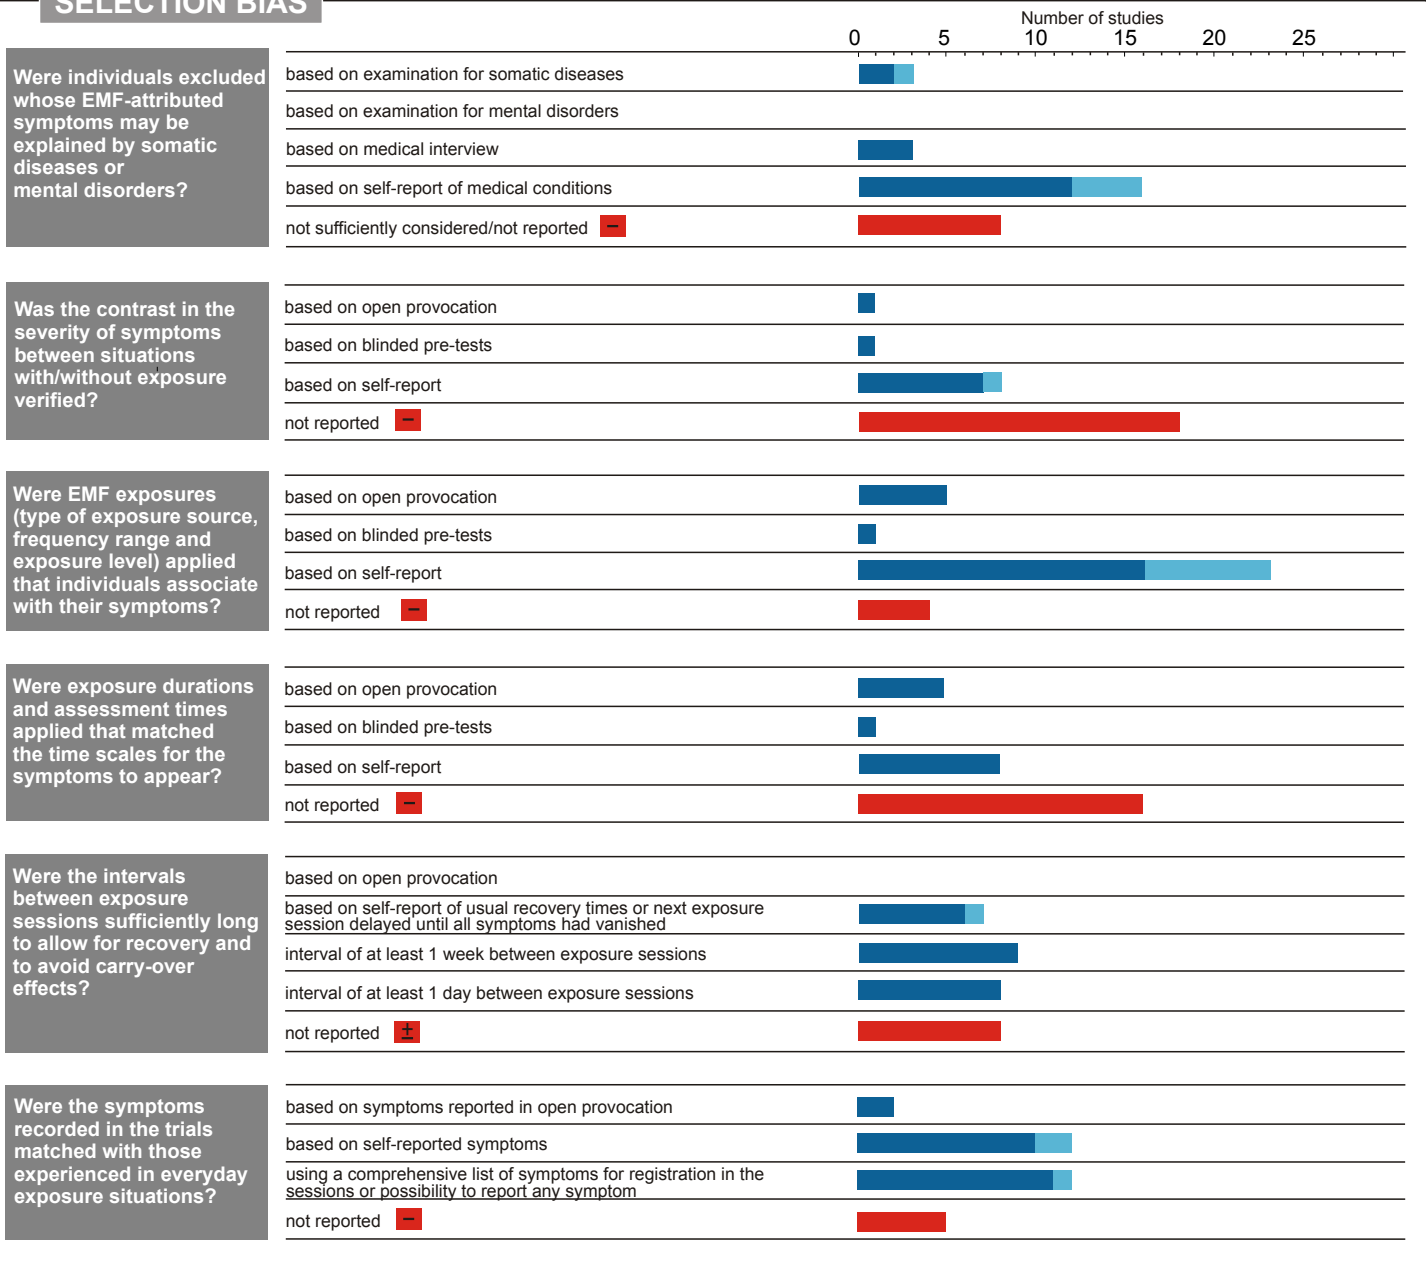

## PERFORMANCE BIAS

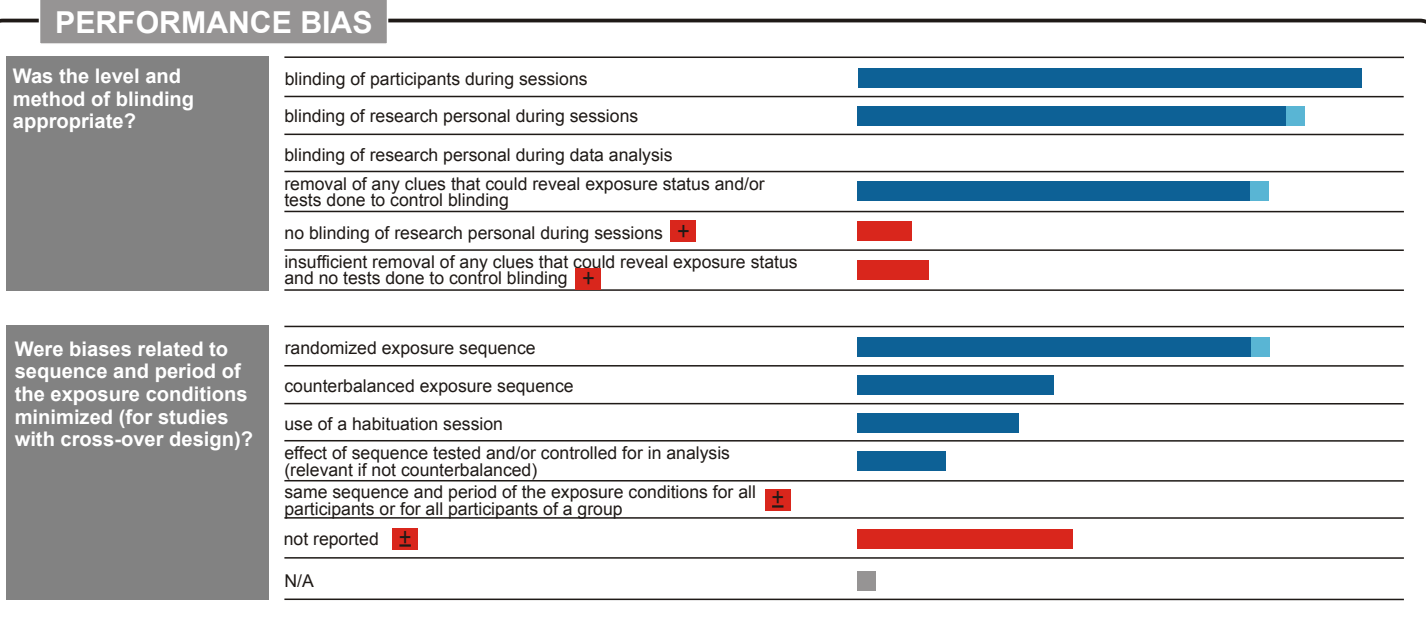

## CONFOUNDING BIAS

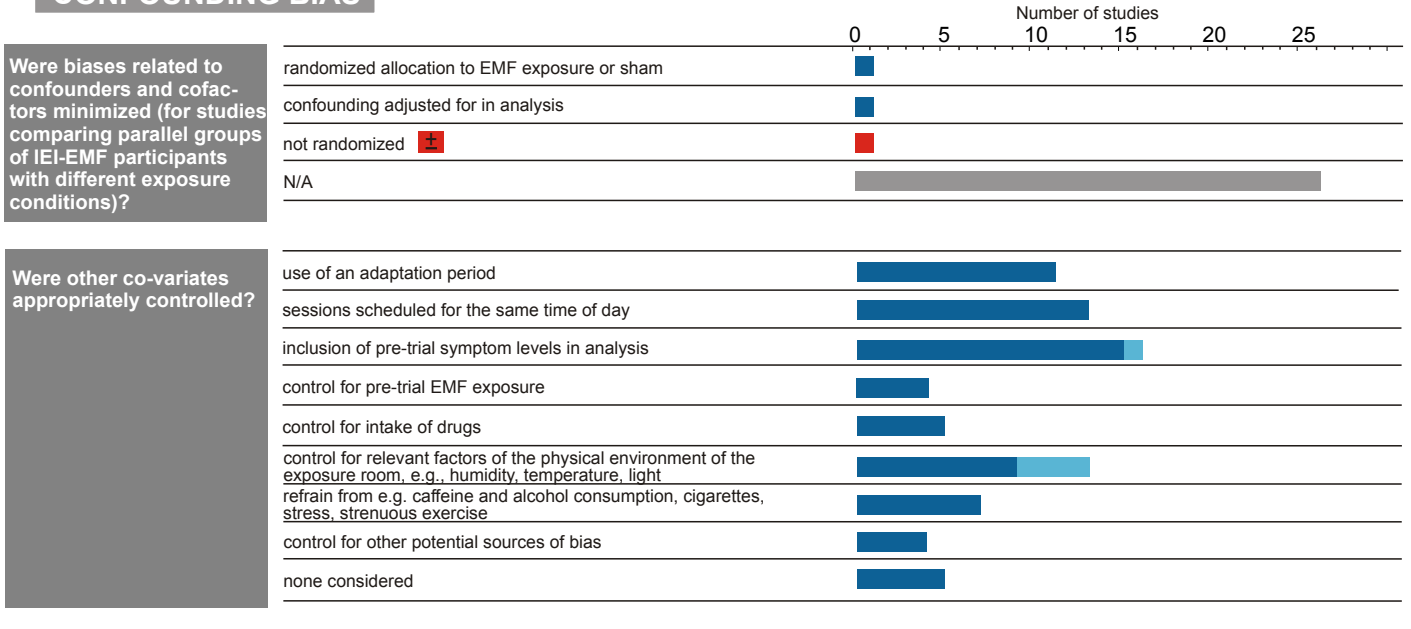

## EXPOSURE BIAS

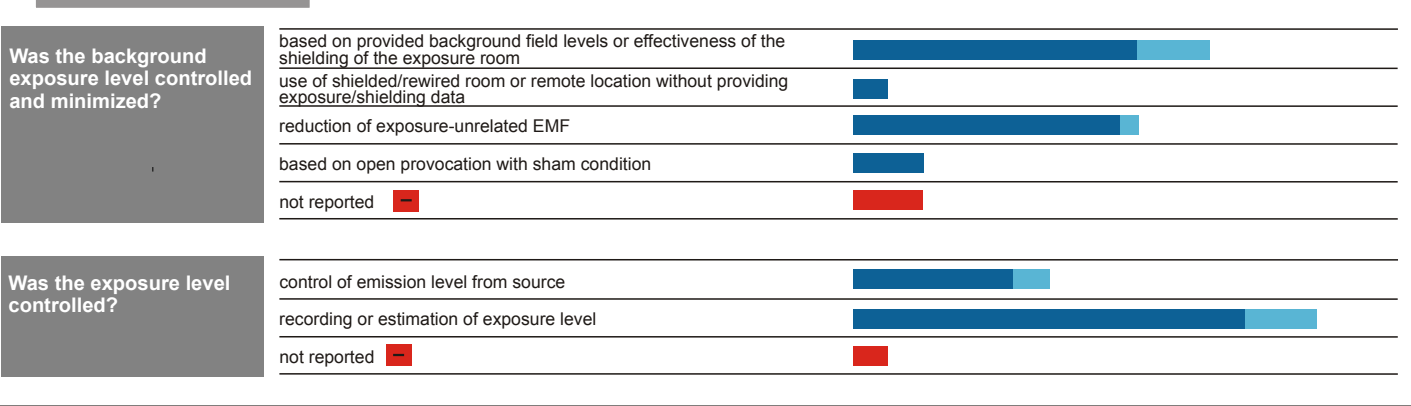

## ATTRITION BIAS

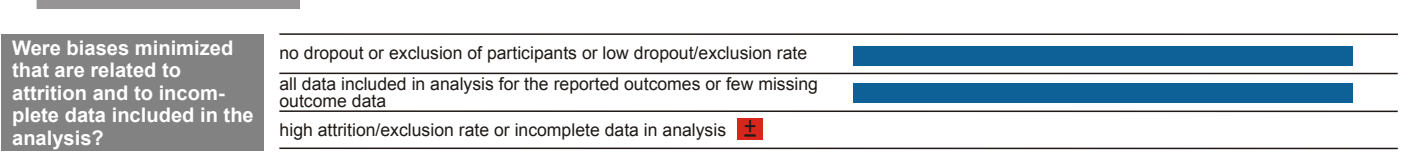

## SELECTIVE REPORTING BIAS

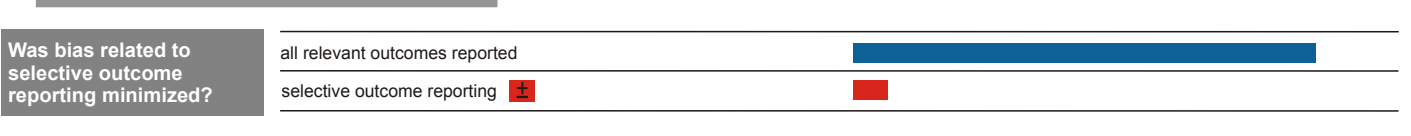

## IMPRECISION

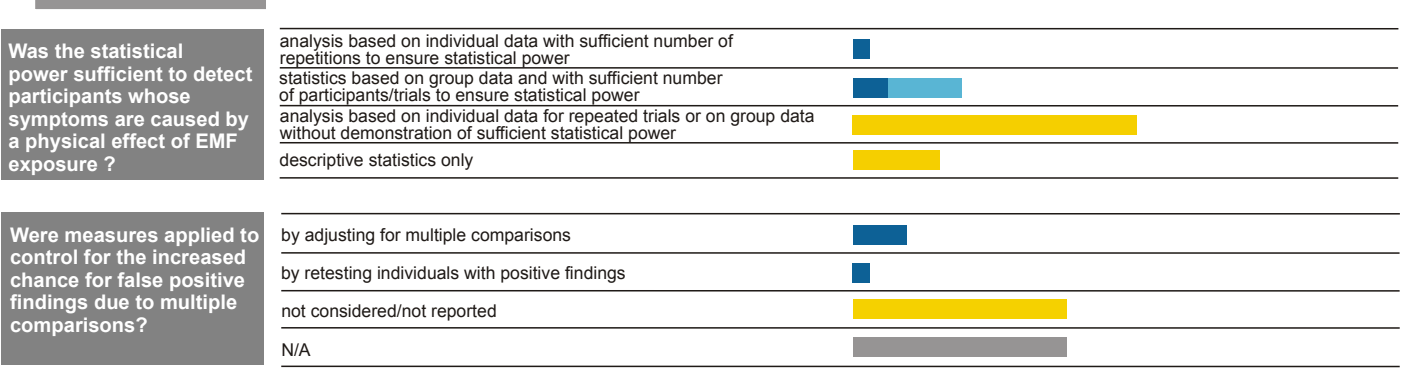

Supplement: 12940_2019_519_MOESM2_ESM.pdf [file 12940_2019_519_MOESM2_ESM.pdf]
